# Supplementary material for: A series of interdigitated Cd(ii) coordination polymers based on 4,6-dibenzoylisophthalic acid and flexible triazole ligands
Source: Royal Society of Chemistry journal article supplement (doi:10.1039/c4ra00246f), 2014-01-01
Supplement: c4ra00246f1.pdf [file c4ra00246f1.pdf]

## Supporting Information

### **A Series of Interdigitated Cd(II) Coordination Polymers based on 4,6-dibenzoylisophthalic acid and Flexible triazole ligands**

*Xiaofei Zhu<sup>a</sup>, Ning Wang<sup>\*b</sup>, Xiaoyan Xie<sup>a</sup>, Ruibin Hou<sup>a</sup>, Defeng Zhou<sup>a</sup>, Yafeng Li<sup>c</sup>, Jun Hu<sup>a</sup>, Xinyuan Li<sup>a</sup>, He Liu<sup>a</sup> and Wang Nie<sup>a</sup>*

*<sup>a</sup>(School of Chemistry and Life Science, Changchun University of Technology, Changchun Jilin 130012, China)*

*<sup>b</sup>(School of Materials Science and Engineering, Nanyang Technological University, Singapore 639798, Singapore)*

*<sup>c</sup>(School of Chemical Engineering, Changchun University of Technology, Changchun Jilin 130012, China)*

---

## Materials and general methods

All reagents and solvents were purchased from commercial sources and used without further purification. Powder X-ray diffraction (PXRD) patterns were collected on a Rigaku  $D_{\max}$  2000 X-ray diffractometer with graphite monochromatized Cu  $K\alpha$  radiation ( $\lambda = 0.154$  nm). The FI-IR spectra were measured in KBr pellets in the range 4000–400  $\text{cm}^{-1}$  on a Mattson Alpha-Centauri spectrometer. Elemental analysis (EA) for C, H and N was performed on a Perkin-Elmer 2400 Elemental Analyzer. Thermogravimetric analysis (TGA) was performed on a Perkin-Elmer Thermal Analyzer under nitrogen atmosphere at a heating rate of 10  $^{\circ}\text{C min}^{-1}$ . The fluorescent property was measured on a FLS920 Edinburgh Luminescence Spectrometer at room temperature with a light source of Xe lamp.

## Single-crystal X-ray crystallography

Colorless block shape single crystal was mounted on a glass fiber for X-ray diffraction analysis. Data was performed at 293(2) K on an Oxford Diffraction Gemini R CCD for **1** and on a Rigaku AFC7R diffractometer for **2** and **3** with graphite-monochromated Mo- $K\alpha$  radiation ( $\lambda = 0.71073$  Å). The structure was solved by Direct Method of SHELXS-97 and refined by full-matrix least-squares techniques using the SHELXL-97 program. [1] All non-hydrogen atoms were refined with anisotropic temperature parameters. All Hydrogen atoms were placed in geometrically idealized position as a riding mode. CCDC 975867 (1), 890982 (2) and 975868 (3) contain the supplementary X-ray crystallographic files in CIF format can be obtained free of charge from The Cambridge Crystallographic Data Centre via <http://www.ccdc.cam.ac.uk/conts/retrieving.html>. The crystallographic data for **1-3** is shown in Table S2.

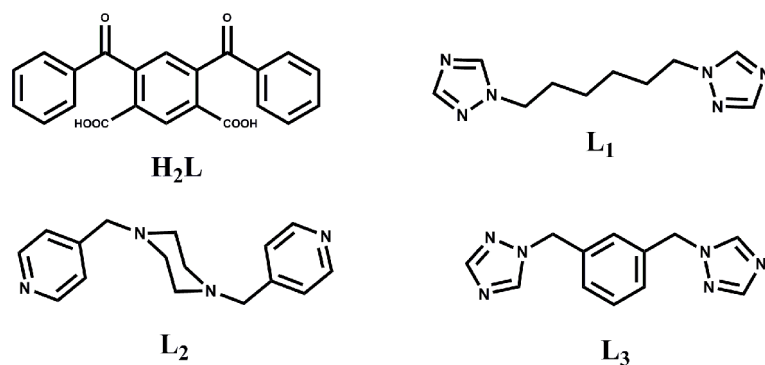

**Scheme S1** Schematic representation of ligands used in this work.

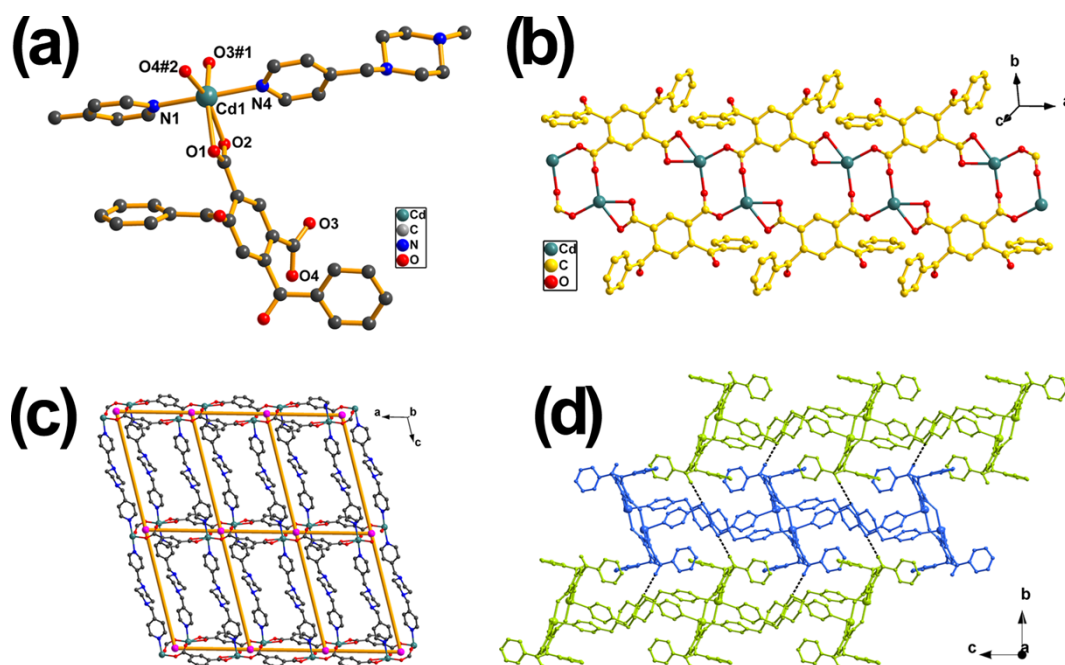

**Figure S1** (a) Coordination environment of Cd ion of **2**. Symmetry codes: #1,  $x + 1, y, z$ ; #2,  $-x + 1, -y + 1, -z + 1$ . (b) View of 1D  $\{Cd(L)\}_n$  chain of **2**. (c) Schematic description of  $4^4$ -sqI layer of **2**. (d) The 3D supramolecular structure of **2** contains a feature of 2D→3D interdigitation. The C31–H31a $\cdots$ O6 hydrogen-bonding interactions are showing in dashed black lines.

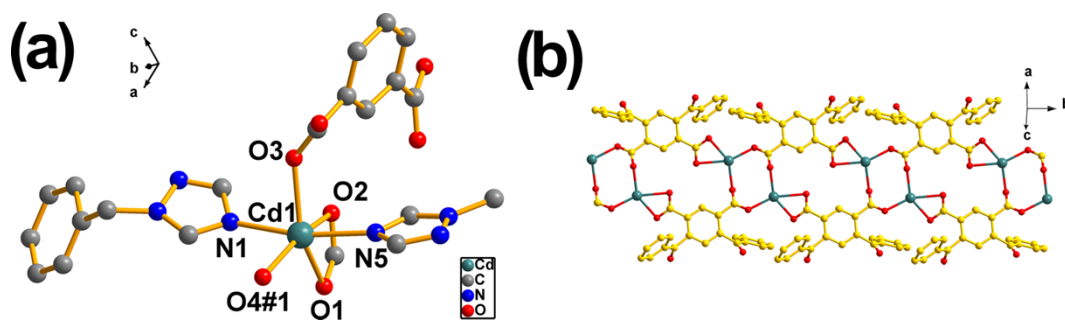

**Figure S2** (a) Coordination environment of Cd ion of **3**. Symmetry codes: #1, 1-x, 2-y, 1-z. (b) View of 1D {Cd(L)}<sub>n</sub> chain of **3**.

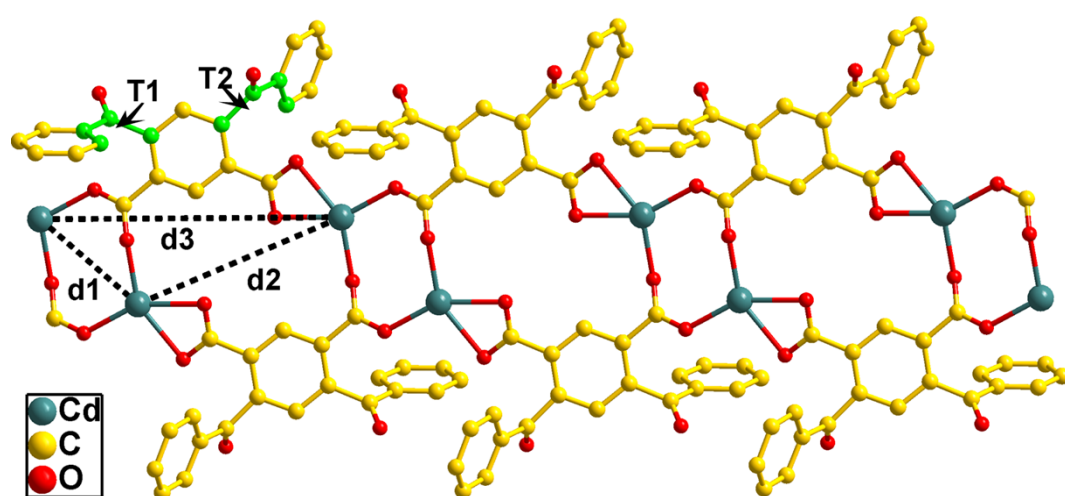

**Figure S3** View of the distance and the torsion angles between the selected atoms. As shown in table S1, only slight difference of the 1D {Cd(L)}<sub>n</sub> chains can be found in the three title compounds. That is, the distances of d<sub>3</sub> gradually increase while the torsion angles of T<sub>1</sub> and T<sub>2</sub> gradually decreases (except for T<sub>2</sub> of compound **2**) as the flexibility of the N-donor ligands reduced from L<sub>1</sub> to L<sub>3</sub>.

**Table S1** Distances of Cd···Cd and torsion angles of the selected atoms.<sup>a</sup>

|                   | d <sub>1</sub> (Å) | d <sub>2</sub> (Å) | d <sub>3</sub> (Å) | T <sub>1</sub> (°) <sup>b</sup> | T <sub>2</sub> (°) <sup>c</sup> |
|-------------------|--------------------|--------------------|--------------------|---------------------------------|---------------------------------|
| Compound <b>1</b> | 4.439              | 7.329              | 10.385             | 26.396(5)                       | 10.654(5)                       |
| Compound <b>2</b> | 4.497              | 7.563              | 10.430             | 25.517(6)                       | -24.300(7)                      |
| Compound <b>3</b> | 4.454              | 7.613              | 10.522             | 21.013(9)                       | 5.091(9)                        |

<sup>a</sup> d = distance of the selected atoms; T = Torsion angles of the selected atoms.

<sup>b</sup> C3-C8-C9-C14 for **1**, C6-C9-C10-C11 for **2** and C6-C9-C10-C11 for **3**, respectively.

<sup>c</sup> C5-C16-C17-C22 for **1**, C8-C16-C17-C22 for **2** and C8-C16-C17-C18 for **3**, respectively.

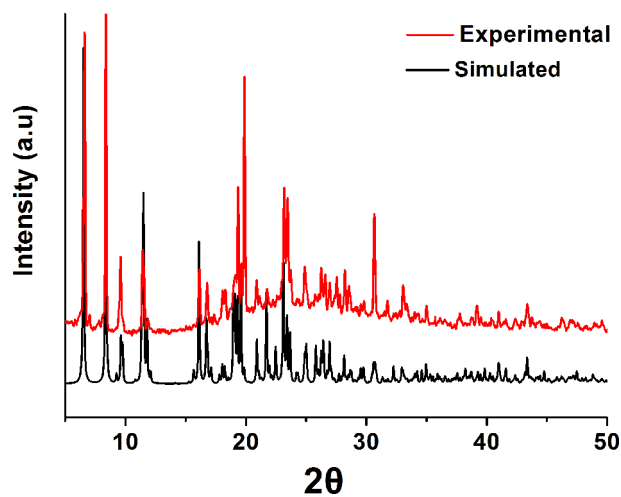

Figure S4 The PXR D patterns of 1.

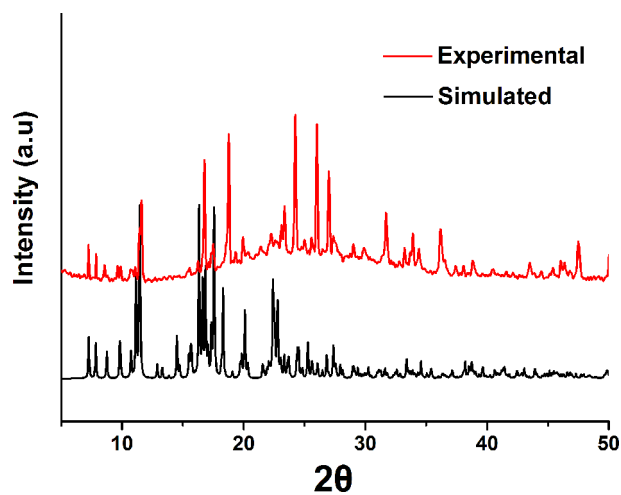

Figure S5 The PXR D patterns of 2.

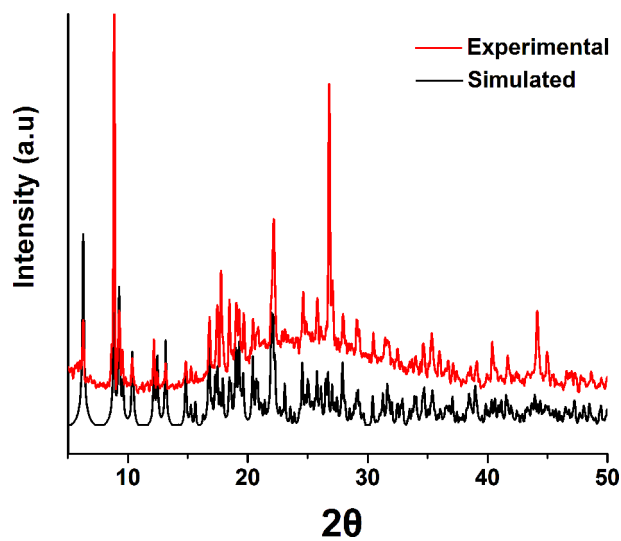

Figure S6 The PXR D patterns of 3.

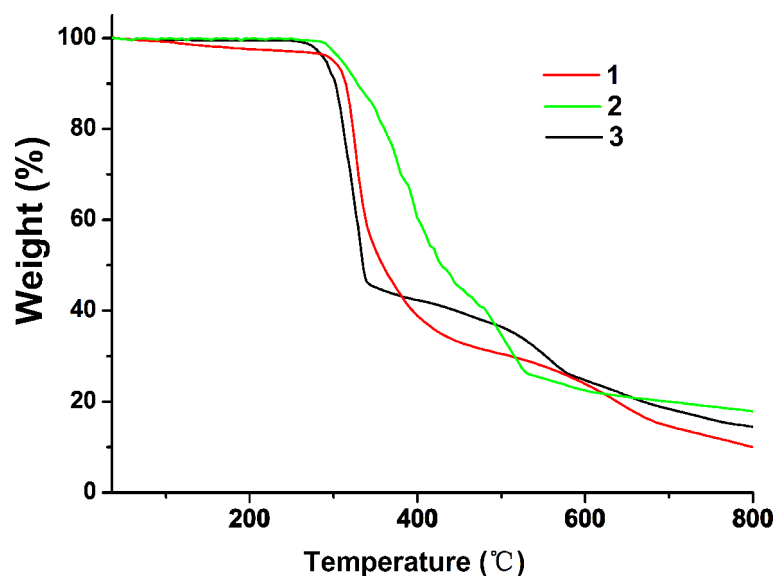

Figure S7 Thermogravimetric analysis curves of 1–3.

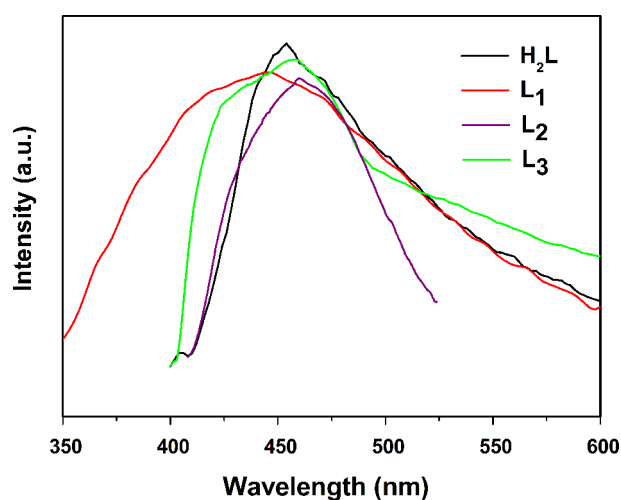

Figure S8 Emission spectra of free ligands.

Table S2 Crystal data and structure refinement parameters for compounds 1–3.

| Complex         | 1                      | 2                      | 3                      |
|-----------------|------------------------|------------------------|------------------------|
| Formula         | $C_{32}H_{28}CdN_6O_6$ | $C_{38}H_{32}CdN_4O_6$ | $C_{34}H_{24}CdN_6O_6$ |
| Formula weight  | 705.00                 | 753.08                 | 725.00                 |
| Crystal system  | Triclinic              | Monoclinic             | Monoclinic             |
| Space group     | $P-1$                  | $P2_1/c$               | $P2_1/c$               |
| $a/\text{\AA}$  | 10.3849(5)             | 10.430(5)              | 15.402(5)              |
| $b/\text{\AA}$  | 11.6302(3)             | 20.209(8)              | 10.522(3)              |
| $c/\text{\AA}$  | 13.8223(6)             | 16.880(7)              | 20.877(5)              |
| $\alpha/^\circ$ | 99.133(3)              | 90                     | 90.00                  |
| $\beta/^\circ$  | 91.357(4)              | 104.816(7)             | 114.070(17)            |
| $\gamma/^\circ$ | 112.426(4)             | 90                     | 90.00                  |

|                                |                |                |                |
|--------------------------------|----------------|----------------|----------------|
| $V/\text{\AA}^3$               | 1517.11(11)    | 3440(3)        | 3089.1(15)     |
| $Z$                            | 2              | 4              | 4              |
| $D_c/\text{g cm}^{-3}$         | 1.543          | 1.454          | 1.559          |
| $\mu/\text{mm}^{-1}$           | 0.775          | 0.687          | 0.764          |
| $F(000)$                       | 716            | 1536           | 1464           |
| $R_{\text{int}}$               | 0.0272         | 0.0591         | 0.0678         |
| GOF                            | 1.029          | 1.183          | 1.068          |
| $R_1, wR_2^a [I > 2\sigma(I)]$ | 0.0375, 0.0911 | 0.0583, 0.1382 | 0.0596, 0.1498 |
| $R_1, wR_2^a$ (all data)       | 0.0439, 0.0954 | 0.0753, 0.1562 | 0.0949, 0.1902 |

$$^a R_1 = \sum ||F_o| - |Fc|| / \sum |F_o|. \quad wR_2 = \sum [w(F_o^2 - F_c^2)^2] / \sum [w(F_o^2)^2]^{1/2}$$

**Table S3** Selected bond lengths (Å) and Angles (°) of **1-3**.<sup>a</sup>

| <b>1</b>            |            |                   |            |
|---------------------|------------|-------------------|------------|
| Cd(1)-O(1)          | 2.220(2)   | Cd(1)-O2#1        | 2.339(2)   |
| Cd(1)-N(1)          | 2.285(3)   | Cd(1)-O(3)        | 2.493(2)   |
| Cd(1)-N(4)          | 2.295(3)   | Cd(1)-C(15)       | 2.727(3)   |
| Cd(1)-O(4)          | 2.317(2)   |                   |            |
| O(1)-Cd(1)-N(1)     | 109.40(10) | N(4)-Cd(1)-O(2)#1 | 79.87(10)  |
| O(1)-Cd(1)-N(4)     | 89.76(10)  | O(4)-Cd(1)-O(2)#1 | 153.07(8)  |
| N(1)-Cd(1)-N(4)     | 158.79(12) | O(1)-Cd(1)-O(3)   | 149.57(8)  |
| O(1)-Cd(1)-O(4)     | 97.72(8)   | N(1)-Cd(1)-O(3)   | 86.03(10)  |
| N(1)-Cd(1)-O(4)     | 92.18(10)  | N(4)-Cd(1)-O(3)   | 81.32(10)  |
| N(4)-Cd(1)-O(4)     | 94.20(10)  | O(4)-Cd(1)-O(3)   | 54.46(8)   |
| O(1)-Cd(1)-O(2)#1   | 108.43(8)  | O(2)-Cd(1)-O(3)#1 | 98.61(8)   |
| N(1)-Cd(1)-O(2)#1   | 85.31(10)  |                   |            |
| <b>2</b>            |            |                   |            |
| Cd(1)-O(4)#1        | 2.227(3)   | Cd(1)-N(1)        | 2.330(4)   |
| Cd(1)-O(3)#2        | 2.291(3)   | Cd(1)-O(2)        | 2.400(3)   |
| Cd(1)-N(4)          | 2.311(4)   | Cd(1)-O(1)        | 2.408(3)   |
| O(3)#2-Cd(1)-O(2)   | 92.66(11)  | N(4)-Cd(1)-O(2)   | 86.32(13)  |
| O(4)#1-Cd(1)-O(3)#2 | 112.76(12) | N(1)-Cd(1)-O(2)   | 87.93(13)  |
| O(4)#1-Cd(1)-N(4)   | 100.73(13) | O(4)#1-Cd(1)-O(1) | 99.38(11)  |
| O(3)#2-Cd(1)-N(4)   | 87.65(13)  | O(3)#2-Cd(1)-O(1) | 147.62(12) |
| O(4)#1-Cd(1)-N(1)   | 89.10(13)  | N(4)-Cd(1)-O(1)   | 90.21(14)  |
| O(3)#2-Cd(1)-N(1)   | 81.95(14)  | N(1)-Cd(1)-O(1)   | 95.22(14)  |
| N(4)-Cd(1)-N(1)     | 167.86(14) | O(2)-Cd(1)-O(1)   | 54.96(11)  |
| O(4)#1-Cd(1)-O(2)   | 153.71(11) |                   |            |
| <b>3</b>            |            |                   |            |
| Cd1-O4#1            | 2.213(4)   | Cd1-O3            | 2.314(4)   |

|             |            |             |            |
|-------------|------------|-------------|------------|
| Cd1-N1      | 2.298(5)   | Cd1-O1      | 2.321(4)   |
| Cd1-N5      | 2.302(5)   | Cd1-O2      | 2.509(4)   |
| O4-Cd1-N1#1 | 86.47(17)  | O3-Cd1-O1   | 145.91(14) |
| O4-Cd1-N5#1 | 105.47(17) | O4-Cd1-O2#1 | 156.70(13) |
| N1-Cd1-N5   | 166.97(19) | N1-Cd1-O2   | 83.56(16)  |
| O4-Cd1-O3#1 | 108.26(15) | N5-Cd1-O2   | 87.08(17)  |
| N1-Cd1-O3   | 83.19(18)  | O3-Cd1-O2   | 91.42(13)  |
| N5-Cd1-O3   | 88.02(17)  | O1-Cd1-O2   | 54.55(13)  |
| O4-Cd1-O1#1 | 105.39(14) | N5-Cd1-O1   | 88.26(17)  |
| N1-Cd1-O1   | 93.64(17)  |             |            |

<sup>a</sup> Symmetry transformations used to generate equivalent atoms: For **1**: #1, 1-x, 1-y, 1-z. For **2**: #1, x + 1, y, z; #2, -x + 1, -y + 1, -z + 1. For **3**: #1, 1-x, 2-y, 1-z.

**Table S4** Hydrogen-bonding geometry parameters for **1**.

| D-H...A      | d(D-H) (Å) | d(H...A) (Å) | d(D...A) (Å) | <(DHA) (°) |
|--------------|------------|--------------|--------------|------------|
| C20-H20...O6 | 0.93       | 2.56         | 3.487(6)     | 176        |

**Table S5** Hydrogen-bonding geometry parameters for **2**.

| D-H...A       | d(D-H) (Å) | d(H...A) (Å) | d(D...A) (Å) | <(DHA) (°) |
|---------------|------------|--------------|--------------|------------|
| C31-H31a...O6 | 0.97       | 2.38         | 3.333(8)     | 166        |

**Table S6** Hydrogen-bonding geometry parameters for **3**.

| D-H...A       | d(D-H) (Å) | d(H...A) (Å) | d(D...A) (Å) | <(DHA) (°) |
|---------------|------------|--------------|--------------|------------|
| C25-H25a...O6 | 0.97       | 2.647        | 3.487(6)     | 145        |

*References:*

- [1] (a) G. M. Sheldrick, *SHELXS-97: Programs for X-ray Crystal Structure Solution*; University of Göttingen: Göttingen, Germany, 1997;  
 (b) G. M. Sheldrick, *SHELXL-97: Programs for X-ray Crystal Structure Refinement*; University of Göttingen: Göttingen, Germany, 1997.
